# Supplementary material
Source: Elsevier journal article supplement (https://www.sciencedirect.com/science/article/pii/S0033833821000837)
Supplement: mmc1 [file S0033833821000837:mmc1.doc]

**Pie de foto extendido de la figura 2.** Posibles mecanismos fisiopatológicos implicados en las lesiones neurológicas por el virus SARS-CoV-2 con sus respectivas manifestaciones en las pruebas de imagen (fondo gris). En cursiva, los argumentos a favor de cada uno de los mecanismos principales.

La posibilidad de ***lesión directa del sistema nervioso por el virus SARS-CoV-2*** es controvertida. No se ha conseguido documentar la presencia del virus SARS-CoV-2 en la RT-PCR del líquido cefalorraquídeo, salvo publicaciones aisladas1,2 con trazas en nervios olfatorios, lóbulo frontal y médula, que incluso podrían estar localizadas en vasos3, hallazgos de dudoso significado lesional directo, siendo el único dato histológico reseñable la presencia de inflamación perivascular por linfocitos3. Pero, por otro lado, la presencia documentada de receptores de la ECA-2 en neuronas y células gliales4, de ARN viral en neuronas de pacientes que murieron por SARS5, los síntomas precoces de ageusia y anosmia, las lesiones en resonancia magnética (RM) en nervios olfatorios y en el giro recto posterior1,6,7 y la tomografía computarizada de senos paranasales sin datos de alteraciones en la conducción8 en pacientes con anosmia, y la presencia de receptores de ECA-2 en el epitelio olfatorio9 han contribuido a interpretar los datos histológicos anteriores como un paso directo retrógrado del virus desde el epitelio nasofaríngeo a los nervios olfatorios y al tejido cerebral10. Además, también se ha sugerido la posible llegada del virus por vía hematógena a través de linfocitos infectados que parecen comprometer la integridad de las células endoteliales de la barrera hematoencefálica, con paso al líquido cefalorraquídeo y, finalmente, a neuronas y células gliales1,4,11. La ***lesión endotelial*** directa por el virus se sustenta en que se han encontrado receptores de la ECA-2 en células endoteliales12 y un peor pronóstico en pacientes con factores de riesgo conocidos de disfunción endotelial: hipertensión, diabetes y obesidad13,14. El síndrome de encefalopatía posterior reversible (PRES) podría producirse por daño endotelial directo por el SARS-CoV-2, con aumento de la permeabilidad de la barrera hematoencefálica, pérdida de la regulación hemostática y edema cerebral, si bien el mecanismo es discutible15. El daño endotelial, la coagulopatía por consumo de fibrinógeno16 y los tratamientos anticoagulantes15 podrían desencadenar las macrohemorragias, si bien el mecanismo preciso tampoco está claro. Se debate si los focos hipointensos encontrados en secuencias de susceptibilidad magnética en RM se deben a microhemorragias o microtrombos en pequeñas arterias y venas corticales13,14,17. La trombosis venosa también podría explicar la rotura de la barrera hematoencefálica y las pequeñas hemorragias petequiales. No obstante, ante las cifras elevadas de marcadores inflamatorios (proteína C reactiva y dímero D), otros creen que no es directamente el virus, sino la respuesta hiperinmune la principal implicada18, favoreciendo ***respuestas desmielinizantes para- o postinfecciosas****,* tanto en el sistema nervioso central (SNC) como en el periférico, con casos documentados de síndrome Guillain Barré19 y su variante en el SNC, el síndrome de Miller Fisher (SMF). En el caso del SMF también se postula un daño directo del nervio por el virus ante la no positividad de los marcadores serológicos característicos (test de gangliosidasa15). La respuesta hiperinmune también puede activar la cascada de la coagulación y favorecer un estado protrombótico20 que, junto con la hipercoagulabilidad, hiperviscosidad8 y el daño endotelial, explicarían la elevada frecuencia de lesiones isquémicas. Prueba de ello es también una mayor tasa de trombosis venosa profunda y de embolia pulmonar20 en el paciente crítico, tanto por SARS-CoV-2 (30% frente a 7,7% en pacientes no infectados21) como por otros coronavirus, a pesar de un tratamiento anticoagulante óptimo22. Estos mecanismos también estarían implicados en las lesiones hemorrágicas. Algunos autores creen que existe un efecto sinérgico de todos estos mecanismos expuestos18. ***Otros posibles mecanismos*** implicados son la hipoxia, el efecto de la presión positiva de los sistemas de ventilación, alteraciones metabólicas, toxicidad o efectos sistémicos de la sepsis, muchos de ellos presentes en el paciente crítico.

**Bibliografía**

1. Behzad S, Aghaghazvini L, Radmard AR, Gholamrezanezhad A. Extrapulmonary manifestations of COVID-19: Radiologic and clinical overview. Clin Imaging. 2020;66:35-41.

2. Moriguchi T, Harii N, Goto J, Harada D, Sugawara H, Takamino J, et al. A first case of meningitis/encephalitis associated with SARS-Coronavirus-2. Int J Infect Dis. 2020;94:55-8. doi: 10.1016/j.ijid.2020.03.062. Epub 2020 Apr 3. PMID: 32251791; PMCID: PMC7195378.

3. Solomon IH, Normandin E, Bhattacharyya S, Mukerji SS, Keller K, Ali AS, et al. Neuropathological Features of Covid-19. N Engl J Med. 2020;383:989-92. doi: 10.1056/NEJMc2019373. Epub 2020 Jun 12. PMID: 32530583; PMCID: PMC7304421.

4. Zubair AS, McAlpine LS, Gardin T, Farhadian S, Kuruvilla DE, Spudich S. Neuropathogenesis and Neurologic Manifestations of the Coronaviruses in the Age of Coronavirus Disease 2019: A Review. JAMA Neurol. 2020;77:1018-27. doi: 10.1001/jamaneurol.2020.2065. PMID: 32469387; PMCID: PMC7484225.

5. Zhang QL, Ding YQ, Hou JL, He L, Huang ZX, Wang HJ, et al. [Detection of severe acute respiratory syndrome (SARS)-associated coronavirus RNA in autopsy tissues with in situ hybridization]. Di Yi Jun Yi Da Xue Xue Bao. 2003;23:1125-7. Chinese. PMID: 14625166.

6. Mao L, Jin H, Wang M, Hu Y, Chen S, He Q, et al. Neurologic Manifestations of Hospitalized Patients With Coronavirus Disease 2019 in Wuhan, China. JAMA Neurol. 2020;77:683-90. doi: 10.1001/jamaneurol.2020.1127. PMID: 32275288; PMCID: PMC7149362.

7. Paderno A, Schreiber A, Grammatica A, Raffetti E, Tomasoni M, Gualtieri T, et al Smell and taste alterations in COVID-19: a cross-sectional analysis of different cohorts. Int Forum Allergy Rhinol. 2020;10:955-62. doi: 10.1002/alr.22610. Epub 2020 Jun 25. PMID: 32410386; PMCID: PMC7272886.

8. Naeini AS, Karimi-Galougahi M, Raad N, Ghorbani J, Taraghi A, Haseli S, et al. Paranasal sinuses computed tomography findings in anosmia of COVID-19. Am J Otolaryngol. 2020;41:102636. doi: 10.1016/j.amjoto.2020.102636. Epub 2020 Jul 3. PMID: 32652405.

9. Bilinska K, Jakubowska P, Von Bartheld CS, Butowt R. Expression of the SARS-CoV-2 Entry Proteins, ACE2 and TMPRSS2, in Cells of the Olfactory Epithelium: Identification of Cell Types and Trends with Age. ACS Chem Neurosci. 2020;11:1555-62. doi: 10.1021/acschemneuro.0c00210. Epub 2020 May 19. PMID: 32379417; PMCID: PMC7241737.

10. Mankad K, Perry MD, Mirsky DM, Rossi A. COVID-19: A primer for Neuroradiologists. Neuroradiology. 2020;62:647-8. doi: 10.1007/s00234-020-02437-5. PMID: 32342126; PMCID: PMC7186113.

11. Poyiadji N, Shahin G, Noujaim D, Stone M, Patel S, Griffith B. COVID-19-associated Acute Hemorrhagic Necrotizing Encephalopathy: Imaging Features. Radiology. 2020;296:E119-20. doi: 10.1148/radiol.2020201187. Epub 2020 Mar 31. PMID: 32228363; PMCID: PMC723338613.

12. Hoffmann M, Kleine-Weber H, Schroeder S, Krüger N, Herrler T, Erichsen S, et al. SARS-CoV-2 Cell Entry Depends on ACE2 and TMPRSS2 and Is Blocked by a Clinically Proven Protease Inhibitor. Cell. 2020;181:271-80.e8.

13. Deanfield JE, Halcox JP, Rabelink TJ. Endothelial function and dysfunction: testing and clinical relevance. Circulation. 2007;115:1285-95. doi: 10.1161/CIRCULATIONAHA.106.652859. PMID: 17353456.

14. Richardson S, Hirsch JS, Narasimhan M, Crawford JM, McGinn T, Davidson KW, et al. Presenting Characteristics, Comorbidities, and Outcomes Among 5700 Patients Hospitalized With COVID-19 in the New York City Area. JAMA. 2020;323:2052-9. doi: 10.1001/jama.2020.6775. Erratum in: JAMA. 2020 May 26;323(20):2098. PMID: 32320003; PMCID: PMC7177629.

15. Lin E, Lantos JE, Strauss SB, Phillips CD, Campion TR Jr, Navi BB, et al. Brain Imaging of Patients with COVID-19: Findings at an Academic Institution during the Height of the Outbreak in New York City. AJNR Am J Neuroradiol. 2020;41:2001-8. doi: 10.3174/ajnr.A6793. Epub 2020 Aug 20. PMID: 32819899; PMCID: PMC7658823.

16. Valderrama EV, Humbert K, Lord A, Frontera J, Yaghi S. Severe Acute Respiratory Syndrome Coronavirus 2 Infection and Ischemic Stroke. Stroke. 2020;51:e124-7. doi: 10.1161/STROKEAHA.120.030153. Epub 2020 May 12. PMID: 32396456.

17. Nicholson P, Alshafai L, Krings T. Neuroimaging Findings in Patients with COVID-19. AJNR Am J Neuroradiol. 2020;41:1380-3. doi: 10.3174/ajnr.A6630. Epub 2020 Jun 11. PMID: 32527843; PMCID: PMC7658900.

18. Katal S, Balakrishnan S, Gholamrezanezhad A. Neuroimaging and neurologic findings in COVID-19 and other coronavirus infections: A systematic review in 116 patients. J Neuroradiol. 2020:S0150-9861(20)30204-2. doi: 10.1016/j.neurad.2020.06.007. Epub ahead of print. PMID: 32603770; PMCID: PMC7320684.

19. Zhao H, Shen D, Zhou H, Liu J, Chen S. Guillain-Barré syndrome associated with SARS-CoV-2 infection: causality or coincidence? Lancet Neurol. 2020;19:383-4. doi: 10.1016/S1474-4422(20)30109-5. Epub 2020 Apr 1. PMID: 32246917; PMCID: PMC7176927.

20. Paterson RW, Brown RL, Benjamin L, Nortley R, Wiethoff S, Bharucha T, et al. The emerging spectrum of COVID-19 neurology: clinical, radiological and laboratory findings. Brain. 2020;143:3104-20. doi: 10.1093/brain/awaa240. PMID: 32637987; PMCID: PMC7454352

21. Lim W, Meade M, Lauzier F, Zarychanski R, Mehta S, Lamontagne F, et al. Failure of anticoagulant thromboprophylaxis: risk factors in medical-surgical critically ill patients*. Crit Care Med. 2015;43:401-10. doi: 10.1097/CCM.0000000000000713. PMID: 25474533.

22. Umapathi T, Kor AC, Venketasubramanian N, Lim CC, Pang BC, Yeo TT, et al. Large artery ischaemic stroke in severe acute respiratory syndrome (SARS). J Neurol. 2004;251:1227-31. doi: 10.1007/s00415-004-0519-8. PMID: 15503102; PMCID: PMC7088071.
